# Supplementary material for: Microstructural origin of selective water oxidation to hydrogen peroxide at low overpotentials: a study on Mn-alloyed TiO2
Source: Royal Society of Chemistry journal article supplement (doi:10.1039/d1ta05451a), 2021-01-01
Supplement: d1ta05451a1.pdf [file d1ta05451a1.pdf]

## Supplementary Information

# Microstructural Origin of Selective Water Oxidation to Hydrogen Peroxide at Low Overpotentials: A Study on Mn-alloyed TiO<sub>2</sub>

Devan Solanki<sup>‡, 1,2</sup> Jiahui Li<sup>‡, 1,2,3</sup> Qianhong Zhu,<sup>1</sup> Xin Shen,<sup>1,2</sup> Grace Callander,<sup>1,2</sup> Jaehong Kim,<sup>1</sup> Yao Gang Li,<sup>3</sup> Hongzhi Wang,<sup>3\*</sup> and Shu Hu<sup>1,2\*</sup>

<sup>1</sup> Department of Chemical and Environmental Engineering, Yale University, New Haven, Connecticut 06520, United States

<sup>2</sup> Energy Sciences Institute, Yale University, 810 West Campus Drive, West Haven, Connecticut 06516, United States

<sup>3</sup> State Key Laboratory for Modification of Chemical Fibers and Polymer Materials, College of Materials Science and Engineering, Donghua University, Shanghai 201620, People's Republic of China.

‡ Jiahui Li and Devan Solanki contributed equally.

\*Email: [shu.hu@yale.edu](mailto:shu.hu@yale.edu); [wanghz@dhu.edu.cn](mailto:wanghz@dhu.edu.cn);

## S1 Experimental Details

### S1.1 Chemical and materials

All chemicals were used as received without any further purification. Tetrakis-dimethylamido-titanium (TDMAT, Sigma-Aldrich, 99.999%) and bis-(ethyl-cyclopentadienyl) manganese ( $\text{Mn}(\text{EtCp})_2$ , Strem Chemicals, 99.999%) precursors for ALD were used as the Ti and Mn sources, respectively. Phosphoric acid ( $\text{H}_3\text{PO}_4$ , 85 wt % in  $\text{H}_2\text{O}$ ), potassium phosphate monobasic ( $\text{KH}_2\text{PO}_4$ ,  $\geq 98\%$ ), and potassium phosphate dibasic ( $\text{K}_2\text{HPO}_4$ ,  $\geq 98\%$ ) were purchased from Sigma-Aldrich.  $\text{H}_2\text{O}$  was obtained from a Millipore deionized water system with a resistivity of 18.0  $\text{M}\Omega\cdot\text{cm}$ . Standard titration potassium permanganate (0.1 N,  $\text{KMnO}_4$ ,  $>98\%$ ) solution was purchased from Alfa-Aesar, Cerium(IV) sulfate tetrahydrate ( $\text{Ce}(\text{SO}_4)_2\cdot 4\text{H}_2\text{O}$ ,  $\geq 98\%$ ), sulfuric acid (1.0 M,  $\text{H}_2\text{SO}_4$ , 99.9%), and hydrogen peroxide ( $\text{H}_2\text{O}_2$ , 30% w/w) was purchased from Sigma-Aldrich.  $\text{H}_2\text{O}_2$  test strips were purchased from Indigo Instruments.

### S1.2 (Ti,Mn) $\text{O}_x$ coating growth, annealing, and electrode fabrication

All catalytic films including (Ti,Mn) $\text{O}_x$ ,  $\text{TiO}_x$ , and  $\text{MnO}_x$  in this study were coated onto both fused silica (denoted as quartz interchangeably) and fluorine-doped tin oxide (denoted as FTO) substrates by using an Ultratech Fiji G2 ALD system. The reaction chamber was kept at 150 °C with an Ar (99.9997%) flow of 60 sccm in the delivery line. Films grown on quartz were used for structural and properties characterizations. The film surfaces were smooth to warrant XPS and UPS measurement to properly yield electronic structure data. **Figure S1** showed the columnar structure for a range of compositions including 4:1 and 16:1 (Ti,Mn) $\text{O}_x$ . The grains from conformal growth coalesce to form a thin-film coating without detectable pinholes. Films grown on FTO were used for electrode fabrication, electrochemical performance measurements, and  $\text{H}_2\text{O}_2$  quantification. Prior to ALD deposition, the FTO substrates were sonicated in ethanol for 30 minutes, dried under an  $\text{N}_2$  flow, and loaded immediately into the ALD chamber. The general strategy of growing (Ti,Mn) $\text{O}_x$  alloy was to deposit 2, 4, 8, and 16 cycles of  $\text{TiO}_2$  per one cycle of  $\text{MnO}_x$  in the middle of the  $\text{TiO}_2$  cycles. The compositions of (Ti,Mn) $\text{O}_x$  films were controlled during ALD by varying the number of  $\text{TiO}_2$  subcycles (2,4,8, and 16 cycles) per one  $\text{MnO}_x$  subcycle in a (Ti,Mn) $\text{O}_x$  supercycle. Mn subcycles were placed in the midpoint within one supercycle sequence, which was then repeated to achieve the desired thickness of ca. 50 nm. This nominal ratio is correlated with but not equal to the elemental composition. For example, 2:1  $\text{TiO}_2$ :  $\text{MnO}_x$  cycle numbers do not mean 33% Mn atomic percentage in a mixture of Mn and Ti atoms, but 54.3% Mn, which is defined as the atomic ratio of  $\text{Mn}\% / (\text{Mn}\% + \text{Ti}\%)$  in the alloy film. The measured Mn atomic % was consistent with the previous publication.<sup>1</sup> The thickness of all the (Ti,Mn) $\text{O}_x$  films was designed for 50 nm. These 50-nm thick films were sufficiently conductive for (Ti,Mn) $\text{O}_x$  to serve as electrocatalysts, and sufficiently thick to fulfil the band diagrams as shown in **Figure 5**. After their growth, all bulk (Ti,Mn) $\text{O}_x$  films studied were annealed in air at 500 °C for two hours. The

temperature increased with a  $4\text{ }^{\circ}\text{C}\cdot\text{min}^{-1}$  ramp rate, and then cooled down without active cooling. Annealing led to crystallization, with interdiffusion of Mn atoms and subsequent ripening of  $\text{MnO}_x$  crystallites. But annealing did not change the surface composition of  $(\text{Ti,Mn})\text{O}_x$  films (see **Figure S3 & Table S1**). As the control, pure  $\text{TiO}_2$  and  $\text{MnO}$  films were deposited by ALD and then air annealed. After being annealed in air at  $500\text{ }^{\circ}\text{C}$  for two hours, crystalline  $\text{TiO}_2$  and  $\text{Mn}_2\text{O}_3$  were obtained. Indium (In) ohmic contacts were soldered onto the exposed FTO surfaces and formed ohmic contacts to bulk  $(\text{Ti,Mn})\text{O}_x$  films. The In contacts were then attached to coiled tin-plated Cu wires using Ag paste. The Cu wire was threaded through a glass tube, and the samples were encapsulated and sealed to the tube end using epoxy (Hysol 9460F). An optical scanner was used to image the exposed electrode, and ImageJ (open-source software made available by NIH) was used to calculate the electrode area.

### **S1.3 Characterizations**

X-ray photoelectron spectroscopy (XPS) and ultraviolet photoelectron spectroscopy (UPS) measurements were taken with a PHI VersaProbe II Scanning XPS Microprobe. XPS characterized the compositions and electronic structures of the annealed  $(\text{Ti,Mn})\text{O}_x$  films. The elemental spectra of O 1s, C 1s, Mn 2p, Mn 3s, and Ti 2p, and the valence spectra were measured. For XPS valence band measurements, all the  $(\text{Ti,Mn})\text{O}_x$  samples were in an excellent ohmic contact with the sample holder, and the sputter-cleaned gold foil was used as a reference to calibrate the binding energy positions. The take-off angles (TOA) of  $5^{\circ}$ ,  $15^{\circ}$ ,  $25^{\circ}$  and  $35^{\circ}$  were used for angular-resolved XPS (AR-XPS). All XPS data were then processed using the CasaXPS software. A Hitachi SU8230 UHR Cold Field Emission scanning electron microscope (SEM) was used to characterize both film thickness and surface morphology for before and after annealing. Crystallinity and phases of  $(\text{Ti,Mn})\text{O}_x$  films on quartz were identified by Grazing Incidence X-ray Diffraction (GIXRD) using a Rigaku SmartLab X-ray diffractometer equipped with high-resolution parallel beam optics. A 1.5 kW copper tube operated at 20 kV and 2 mA; and the angle ( $\omega$ ) of X-ray incidence was fixed at  $0.24^{\circ}$ ; a 2-theta ( $2\theta$ ) scan was carried out from  $20^{\circ}$  to  $60^{\circ}$ . Grazing incidence for annealed  $\text{TiO}_x$  was carried out at  $1.5^{\circ}$ . Plan-view transmission electron microscopy (TEM) was performed on both the annealed 2:1 and 4:1  $(\text{Ti,Mn})\text{O}_x$  films using an FEI Tecnai Osiris operating at 200 kV, equipped with a quadrant energy-dispersive X-ray (EDX) detector.

### **S1.4 Electrochemical measurements**

The electrochemical behaviour of  $(\text{Ti,Mn})\text{O}_x$  electrodes was measured with a three-electrode setup. A Bio-Logic S200 potentiostat system connected the  $(\text{Ti,Mn})\text{O}_x$  working electrode, an Ag/AgCl reference electrode using saturated KCl solutions, and a Ti foil as the counter electrode. The Ti counter electrode was chosen to keep consistent with a previous study.<sup>2</sup> A cation exchange membrane separates the  $(\text{TiMn})\text{O}_x$  and

the Ti foil electrodes to confine the H<sub>2</sub>O<sub>2</sub> production in the working electrode compartment. Cyclic voltammetry was acquired with a scan rate of 20 mV·s<sup>-1</sup>.

Chronopotentiometry (CP) and chronoamperometry (CA) were used for evaluating faradaic efficiency (FE) and long-term stability in a three-electrode cell. Uncompensated electrolyte series resistance was extracted from the impedance data measured at open circuits, and then corrected for the measured electrochemical current-potential behavior. Due to these factors, the measurement error of overpotentials reported in this work is 20 mV. Electrochemical impedance spectroscopy (EIS) was employed using the same cell as those used for the cyclic voltammetry, except measured in a Fe(CN)<sub>6</sub><sup>3-/4-</sup> redox couple electrolyte; this electrolyte is an aqueous solution containing 0.2 M K<sub>3</sub>Fe(CN)<sub>6</sub> (Fisher Scientific, 99.4%), 0.2 M K<sub>4</sub>Fe(CN)<sub>6</sub> (Fisher Scientific, 99.4%), and 0.2 M K<sub>2</sub>SO<sub>4</sub> (Sigma-Aldrich, 99.0%). Fitting the EIS data achieved the quantification of the resistance through the (Ti,Mn)O<sub>x</sub> coatings.

### S1.5 H<sub>2</sub>O<sub>2</sub> quantification

The generated H<sub>2</sub>O<sub>2</sub> molar quantity was detected by using a combination of H<sub>2</sub>O<sub>2</sub> test strips, Ce(SO<sub>4</sub>)<sub>2</sub> titration, and KMnO<sub>4</sub> titration. HPLC was only used initially for product identification and precision verification of other quantification techniques. First, the H<sub>2</sub>O<sub>2</sub> concentration is measured and calibrated by a typical cerium sulfate (e.g., Ce(SO<sub>4</sub>)<sub>2</sub>) titration method based on the Equation S1:

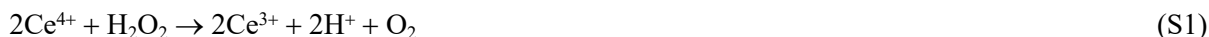

where the yellow Ce<sup>4+</sup> solution was reduced to a colorless Ce<sup>3+</sup> solution by reacting with H<sub>2</sub>O<sub>2</sub>. Thus, the H<sub>2</sub>O<sub>2</sub> concentration can be determined by measuring the Ce<sup>4+</sup> concentration before and after the reaction by using ultraviolet-visible (UV-vis) spectroscopy.

Ce<sup>4+</sup> is only soluble in acidic solutions due to its strong tendency to hydrolyze to hydroxides. Therefore, the yellow transparent 0.5 mM Ce(SO<sub>4</sub>)<sub>2</sub> solution was prepared by dissolving 16.6 mg Ce(SO<sub>4</sub>)<sub>2</sub> in a 100 mL solution of the high purity H<sub>2</sub>SO<sub>4</sub>(aq). The as-received H<sub>2</sub>O<sub>2</sub> (~30%, Sigma-Aldrich) was diluted to 100, 200, 300, 400, and 500 ppm in 0.5 M phosphate buffer solutions of pH=7, and confirmed using H<sub>2</sub>O<sub>2</sub> strips. The calibration curve was obtained by measuring the intensity of UV-vis absorption spectra at 316 nm (**Figure S13a**), for those 4 mL Ce<sup>4+</sup> solutions after the reaction with 50 μL H<sub>2</sub>O<sub>2</sub> with known concentrations. Based on the linear relationship between the UV-vis adsorption intensity and Ce<sup>4+</sup> concentration, the H<sub>2</sub>O<sub>2</sub> concentrations of the samples were determined. The identical absorbance obtained by using pure water and the PB solution during the titration, as shown in **Figure S13b**, also indicates the weak binding interaction. The binding of H<sub>2</sub>O<sub>2</sub> to phosphate anions is sufficiently weak not to overestimate the H<sub>2</sub>O<sub>2</sub> quantity, which is different from the case of carbonate anions.

During KMnO<sub>4</sub> titration, dark purple MnO<sub>4</sub><sup>-</sup> will be reduced to a clear solution by H<sub>2</sub>O<sub>2</sub>. The reaction is presented as Equation S2:

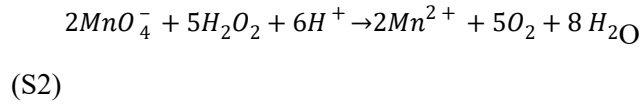

Therefore, the total molar quantity ( $n$ ) of H<sub>2</sub>O<sub>2</sub> generated can be calculated by,

$$n(H_2O_2) = \frac{5}{2}n(MnO_4^-) \quad (S3)$$

During this process, 0.5 M H<sub>2</sub>SO<sub>4</sub> prepared by diluting high purity 1.0 M H<sub>2</sub>SO<sub>4</sub>(aq) was used as the H<sup>+</sup> source. Nine standard H<sub>2</sub>O<sub>2</sub> solutions (0, 1, 3, 5, 10, 25, 50, 75, and 100 ppm) were prepared and tested using the standard strips. The same series of H<sub>2</sub>O<sub>2</sub> standards was quantified by the KMnO<sub>4</sub> titration. Optical spectroscopy was used to determine the titration endpoint at around 525 nm for MnO<sub>4</sub><sup>-</sup> characteristic absorption. The results from the KMnO<sub>4</sub> titration were consistent with the test strips, as shown in **Figure S14**. The same H<sub>2</sub>O<sub>2</sub> standard solutions were quantified by the Ce(SO<sub>4</sub>)<sub>2</sub> titration, and the results are identical to those obtained from the KMnO<sub>4</sub> titration method. It is considered that by using the titration equipment (Titrand, Metrohm AG), nanomolar of KMnO<sub>4</sub> was added incrementally into the H<sub>2</sub>O<sub>2</sub> containing solution. Therefore, the KMnO<sub>4</sub> titration was validated by the Ce(SO<sub>4</sub>)<sub>2</sub> titration, which addresses the potential over-estimation issue due to the H<sub>2</sub>O<sub>2</sub> disproportionation caused by the free ions of Mn<sup>4+</sup> and Mn<sup>2+</sup>. The KMnO<sub>4</sub> titration was mainly used for simplicity.

Faraday efficiency (FE) for H<sub>2</sub>O<sub>2</sub> production, measured in percentage, can be calculated by Equation S4:

$$FE = \frac{\text{Amount of experimentally generated } H_2O_2(\text{mol})}{\text{Amount of theoretically generated } H_2O_2(\text{mol})} \times 100\% \quad (S3)$$

where the amount of experimentally generated H<sub>2</sub>O<sub>2</sub> can be calculated by titration (Equation S2), and the amount of theoretically generated H<sub>2</sub>O<sub>2</sub> can be calculated based on the measured total charge passed at the electrode, assuming a FE=100% for 2e<sup>-</sup> water oxidation (Equation S4).

$$\text{Amount of theoretically generated } H_2O_2(\text{mol}) = \frac{Q (C)}{F (C/mol) \times 2} \quad (S4)$$

where  $Q$  is the charge (C) passed during electrolysis,  $F$  is the Faraday constant (96485.3 C·mol<sup>-1</sup>), 2 is for the 2e<sup>-</sup> transfer process. Two pure 0.5 M PB solutions mixed with 0 and 0.02 μmol KMnO<sub>4</sub>, respectively, were assigned as standard samples to define titration destination, as shown in **Figure S15a**. During a timed

series of H<sub>2</sub>O<sub>2</sub> quantification, 1 mL aliquot was extracted from the H<sub>2</sub>O<sub>2</sub>-containing solution in the working electrode compartment, and was mixed with 1 mL H<sub>2</sub>SO<sub>4</sub> (aq, 1 M) and then titrated. This procedure was repeated three times for each data point. The excess of KMnO<sub>4</sub> in the mixed solution is ca. 0.02 μmol when the titrated line of sample solutions coincides with the magenta line (**Figure S15b**) of the standard sample for titration destination. Then, the molar amount of H<sub>2</sub>O<sub>2</sub> can be calculated. The spectral sensitivity allows a detection accuracy down to 0.02 μmol, which gives a measurement error of ±0.01 mmol·L<sup>-1</sup>. Finally, 1 mL pure PB solution was added to the electrolysis cell as the H<sub>2</sub>O<sub>2</sub> electrolysis continued. H<sub>2</sub>O<sub>2</sub> quantification was also conducted for the electrochemical cell that operated without a membrane to separate the working and counter electrodes, and the FE results were found identical.

Gas chromatography (GC) was used to quantify any O<sub>2</sub> that might be evolved during H<sub>2</sub>O<sub>2</sub> production. The headspace of the anode cell was sealed and was connected to an automatic sampling system. A flow of Ar gas carried any evolved O<sub>2</sub> from the solution and headspace to the GC (SRI Instruments 8610c). The dissolved O<sub>2</sub> concentrations were calibrated by flowing the mixed O<sub>2</sub> and Ar gases of known flow rates. The O<sub>2</sub> peaks were calibrated according to the O<sub>2</sub> concentrations. During selective H<sub>2</sub>O<sub>2</sub> production, little dissolved O<sub>2</sub> was observed in the cell for several experiments. Thus, the FE for H<sub>2</sub>O<sub>2</sub> production was reported only.

## S2 Supplementary Results

### S2.1 Core-level XPS of bulk (Ti,Mn)O<sub>x</sub>

The XPS measurement and spectra analysis concerned the core-level spectral regions of O1s, Ti2p, Mn2p, Mn3s, and the valence-band (VB) spectral region. First, angle-resolved XPS (AR-XPS) was employed to measure the Mn and Ti surface compositions at tilt angles of 10, 20, 30, and 35 degrees (**Figure S3**). For both annealed and as-grown 4:1 (Ti,Mn)O<sub>x</sub> films, Mn compositions were shown to be constant with respect to the tilt angles, which indicated the uniform compositions of Ti and Mn elements within the probing depth from 0.5 to 3.9 nm for both annealed and as-grown films including annealed 4:1 (Ti,Mn)O<sub>x</sub>. Then, regular XPS core-level spectra were measured. C1s core-level spectra were also acquired to validate the minimal surface charging. The C1s spectrum was set at 284.8 eV, and the binding energies (BEs) of the O1s, Ti 2p and Mn 3s spectra were applied with the same BE shift by using C1s as calibration. The fitting analyses for the core-level spectra of O1s, Mn2p, Ti2p<sup>3/2</sup>, and Mn3s sates are listed in **Table S1**.

O1s, Ti2p, Mn2p and Mn3s peaks were measured to quantify the oxidation state of (Ti,Mn)O<sub>x</sub> films, with their spectra shown in **Figure S2**. After annealing, the Ti and Mn elements were still homogeneously distributed throughout the surface into the bulk. Annealing did not vary the Mn at% surface composition,

as indicated in **Table S2**. The 4:1 (Ti,Mn)O<sub>x</sub> O1s core-level spectrum as shown in **Figure S2a** had an intensity maximum at 529.91 eV, consistent with the reported BEs of the oxygen O1s for TiO<sub>2</sub> and Mn<sub>2</sub>O<sub>3</sub>. This spectrum can be fitted with two peaks: the major peak, O<sub>I</sub>, at a lower binding energy that is pertinent to O<sup>2-</sup> ions forming bonds to metal cations; the other broad peak, O<sub>II</sub>, at a higher binding energy is related to non-stoichiometric surface oxygen atoms, which fail to bond to metal cations but grasp surface \*OH groups. **Figure S2b** shows the Ti2p<sup>3/2</sup> and the Ti2p<sup>1/2</sup> core-level peaks at 458.29 eV and 464.25 eV, respectively. The Ti2p<sup>3/2</sup> peak BE agrees well with published data for the Ti(IV) oxidation state in TiO<sub>2</sub>.

The Mn2p<sup>3/2</sup> and Mn3s peaks were used to characterize Mn oxidation states in (Ti,Mn)O<sub>x</sub> films. The Mn2p<sup>3/2</sup> and Mn2p<sup>1/2</sup> for Mn<sub>2</sub>O<sub>3</sub> compounds should range between 641–643 and 654–655 eV, respectively, as reported in the literature.<sup>3</sup> Shown in **Figure S2c**, the Mn2p<sup>3/2</sup> peaks for (Ti,Mn)O<sub>x</sub> films of various compositions were all located at 641.1–641.3 eV. XRD was used to determine Mn oxidation states in complementary with the previous work of using multiple peaks to fit the Mn2p<sup>3/2</sup> spectra.<sup>1</sup> In addition, the two Mn3s core-level peaks has two, multiple split components caused by coupling of the non-ionized 3s electrons with 3d valence-band electrons. The Mn 3s separation ( $\Delta$ Mn 3s, defined as the binding energy difference between Mn 3s<sup>5</sup> and Mn 3s<sup>7</sup>) was measured to be 5.53±0.10 eV. This BE separation indicated the Mn (III) oxidation state and was consistent with the bixbyite Mn<sub>2</sub>O<sub>3</sub> phase identified for annealed (Ti,Mn)O<sub>x</sub>.

## S2.2 Electrochemical surface area (ECSA) of (Ti,Mn)O<sub>x</sub> coatings during operation

All the annealed coatings are conformal to the FTO substrates according to SEM morphology characterizations. Their electrochemically active surface area, or the roughness factor, is calculated by taking the estimated ECSA and dividing by the geometric area of the electrode. In other words, it is calculated as  $C_{edl}/C_s$ , where  $C_{edl}$  and  $C_s$  are the double layer capacitance for the coating in the pH 7 phosphate buffer and the specific capacitance, respectively. The 4:1 ratio (Ti,Mn)O<sub>x</sub> that was annealed at 500 °C for 2 hours had a measured  $C_{edl}$  value of 0.646 mF cm<sup>-2</sup>. A  $C_s$  value of 60 μF cm<sup>-2</sup> was used as the common estimate for oxide surfaces. Therefore, the roughness factor was found to be 10.7.

## S2.3 Valence XPS analysis for (Ti,Mn)O<sub>x</sub> films

All valence XPS spectra were fitted with Gaussian peaks after a Shirley background subtraction. The valence XPS spectra of (Ti,Mn)O<sub>x</sub> films also consist of these two primary peaks of pure TiO<sub>2</sub>. In addition, The annealed 4:1 was found to comprise another set of O 2p peaks (~0.3 eV more positive than that of pure TiO<sub>2</sub>) due to the formation of MnO<sub>x</sub> clusters or nanocrystals. Those Mn hybridized valence levels are designated as Mn 3d<sup>5/2</sup> and Mn 3d<sup>3/2</sup>. The valence spectra of 4:1 (Ti,Mn)O<sub>x</sub> was thus deconvoluted into six peaks. The two primary O 2p peaks were located at 7.10 ± 0.10 eV (purple curve) and 5.00 ± 0.10 eV (green

curve), respectively. Mn 3d<sup>3/2</sup> was located at 3.03 ± 0.10 eV, and Mn 3d<sup>5/2</sup> was located at 1.14 ± 0.10 eV appeared in the lower binding energy region. The intermediate band center was indicated by the intensity maximum of the fitted Mn 3d<sup>5/2</sup>. The position of valence band maximum ( $E_{\text{VBM}}$ ) positions was assigned as the baseline intersection with the linear fit of valence band edges (red tangent lines of O2p- $\pi$  in **Figure 4a**).

The peak fitting and deconvolution indicated that the  $E_{\text{F}}$  was located closer to  $E_{\text{IB}}$  than  $E_{\text{VBM}}$ . The Fermi level,  $E_{\text{F}}$ , was approximately half-way between the TiO<sub>2</sub> conduction band and the top edge of Mn-impurity IBs. Hence, the mechanism of Fermi level lowering is due to electron trapping by Mn-impurity IBs, resulting in a ground state of Mn<sup>3+</sup> cations. These electronic structure analyses suggested that the Mn<sup>3+</sup>-impurity IB would act as the new charge-transport band that enabled electrical conduction through the film thickness without illumination. Under the applied potential in the dark, charge hops from surface intermediates through discrete states in the Mn<sup>3+</sup>-impurity state IB to the back contact, forming an anodic current. By making an analogy to the VB hole transfer at photocatalysts, we reasonably consider that the Mn<sup>3+</sup> IB accepts and transports electrons freely in the dark. Across the (Ti,Mn)O<sub>x</sub> film, the trapped electrons can leave a local Mn site by hopping to a nearby acceptor site. The electrons eventually get injected to the FTO back contact and then to the counter electrode, thus completing the circuit. This charge hopping mechanism is postulated based on recently reported Ti<sup>3+</sup>-defect band mediated charge transport in “leaky” amorphous TiO<sub>2</sub>.<sup>4</sup>

#### **S2.4 UV-vis for (Ti,Mn)O<sub>x</sub> films**

From the UV-Vis spectra of the pure TiO<sub>2</sub>, Mn<sub>2</sub>O<sub>3</sub>, and composite (Ti,Mn)O<sub>x</sub> thin films presented in **Figure S9**, the absorption edges were determined, and based on them the direct band gap energies ( $E_{\text{g}}$ ) were successfully calculated.  $E_{\text{g}}$  for the pure TiO<sub>2</sub> thin film was calculated as ~3.4 eV and for the Mn<sub>2</sub>O<sub>3</sub> ones it was ~2.36 eV. The UV-vis spectra of the composites are close to the spectra of the TiO<sub>2</sub> materials and shifted a bit toward the spectra of the Mn<sub>2</sub>O<sub>3</sub>. This shift was well expressed for the (Ti,Mn)O<sub>x</sub> composite, where  $E_{\text{g}}$  was determined from 3.28 to 2.25 with atomic ratios of Mn from 17.2 % to 54.3 %. For the (Ti,Mn)O<sub>x</sub>, the shift from the bare TiO<sub>2</sub> fibers was not minimal ( $E_{\text{g}}$  in 2:1 composite (Ti,Mn)O<sub>x</sub> is ~2.25 eV), showing the Mn participated electronic structure building, which also consist with Valence XPS results in Figure 4.



## S3 Supplementary Discussions

### S3.1 Interfacial band energetics of (Ti,Mn)O<sub>x</sub> electrocatalysts under anodic potentials

Conventionally, the potential difference from the bulk of a metallic electrode to the redox potential at its electrochemical interface is dropped across the electrochemical double layer. Unlike this metal-liquid interface, an n-type oxide semiconductor in contact with an electrocatalytic surface behaves differently: a band bending region is induced at the solid-state semiconductor side so that the potential difference across the liquid interface is mainly dropped across this band bending region of the oxide. Here the band bending in oxides is due to the positive and fixed space charge of oxygen vacancies. This band bending picture was postulated under the principle of electrostatics, and was recently validated by *in situ* measurements of electrochemical interface energetics by ambient-pressure XPS.<sup>5</sup> Essentially, the density of states at each side of the electrode-electrolyte interface determine the profile of potential drop across the interface. Specifically, the space charge density of a semiconductor or a metal can be smaller or larger than the volume density of the ions in electrolytes or charged species at electrochemical double layers. To generate the band bending diagram, we took the space charge density of  $2.1 \times 10^{20} \text{ cm}^{-3}$  for the ALD-grown TiO<sub>2</sub>, which was determined by the Mott-Schottky analysis.

Because of the sub-surface Mn-impurity intermediate band, the (Ti,Mn)O<sub>x</sub> surfaces exhibited anodic catalytic activity for water oxidation even in the dark. In the bulk of TiO<sub>2</sub> or (Ti,Mn)O<sub>x</sub> coatings, the potential of +1.8 V<sub>RHE</sub> applied to the ohmic FTO contact shifted the Fermi level,  $E_F$ , from +0.29 V<sub>RHE</sub> at flat band to a value of +1.8 V<sub>RHE</sub>. The position-independent value of  $E_F$  is due to zero current flow. We assume the (Ti,Mn)O<sub>x</sub> films have the same order of magnitude oxygen vacancy concentrations and space charge density, because the growth temperatures and precursor chemistry for TiO<sub>2</sub> and (Ti,Mn)O<sub>x</sub> are identical. But this space charge density for TiO<sub>2</sub> or the TiO<sub>2</sub> host oxide of (Ti,Mn)O<sub>x</sub> coatings is orders of magnitude lower than that of the charged ions at the double layer when the films are in contact with a 0.5 M phosphate buffer. Therefore, the band edge positions of the TiO<sub>2</sub> were drawn to “pin” to the electrolyte potentials according to TiO<sub>2</sub>'s experimental values (**Figure 5a and 5b**). We also assume that the (Ti,Mn)O<sub>x</sub> band edge positions are identical to those of TiO<sub>2</sub>. The electron trapping states in the bulk of ALD-grown TiO<sub>2</sub> originated from the native Ti<sup>3+</sup> defect states, whereas the trapping states in the bulk of (Ti,Mn)O<sub>x</sub> films originated from the Mn<sup>3+</sup> impurity states. The light grey regions indicate the unfilled Ti<sup>3+</sup> defect band or Mn<sup>3+</sup> intermediate band.

For (Ti,Mn)O<sub>x</sub> films, the Mn impurities in the form of Mn<sub>2</sub>O<sub>3</sub> crystallites are considered p-type semiconductors of high doping; therefore, at the liquid interface, the potential drop is within the liquid. The resistivity of the Mn<sub>2</sub>O<sub>3</sub> particle film is 1.2 Ohm·cm. We can only estimate the free hole concentration. We assume a mobility of 0.01 – 0.1 cm<sup>2</sup> (V s)<sup>-1</sup>, which is typical for those oxides, and the carrier concentration

was estimated to be ca.  $5 \times 10^{21} \text{ cm}^{-3}$ . The Mn intermediate band is “unpinned” during the range of applied potentials, according to the principle of electrostatics. As the applied potential partially depletes the  $\text{TiO}_2$  nanocrystals, the  $\text{Mn}_2\text{O}_3$  nanocrystallites are filled with electrons. Their Mn IB positions with respect to redox potentials shifted according to the applied potentials. Due to the nanoscale phase segregation of bixbyite  $\text{Mn}_2\text{O}_3$  and rutile  $\text{TiO}_2$ , their band edge alignments were drawn respectively and are drawn in **Figure 4b** as one material. In a future study, the band edge position direct measurements for  $(\text{Ti,Mn})\text{O}_x$  as a function of applied potential should be conducted following the previously reported procedure.<sup>5</sup>

In the case of “leaky”  $\text{TiO}_2$  (**Figure 5a**), the bottom edge of  $\text{Ti}^{3+}$  defect bands aligned at  $+1.58 \text{ V}_{\text{RHE}}$ . These electronic states are not available for accepting charge from  $\text{Ti}^*\text{OH}$  intermediates ( $+2.27 \text{ V}_{\text{RHE}}$ ) for the charge transfer Step (1). The  $J$ - $E$  behavior under the applied potentials of  $+1.6 - 2.6 \text{ V}_{\text{RHE}}$  was shown in **Figure 2a** inset. However, near the  $\text{TiO}_2$ -liquid interface there remained a charge-transfer forbidden region (between  $+1.58$  and  $+2.27 \text{ V}_{\text{RHE}}$ ) where none of the electronic states was made available for charge injection from  $\text{Ti}^*\text{OH}$  surface intermediates ( $+2.27 \text{ V}_{\text{RHE}}$ ) into the  $\text{Ti}^{3+}$ -defect band. Charge tunneling into the  $\text{Ti}^{3+}$ -defect band is neither efficient nor possible for the range of energy levels near the  $\text{Ti}^*\text{OH}$  potential level: the depth of no-state “forbidden” region immediately underneath the liquid interface is determined by the width of the space charge region (40 nm), and is calculated to be much wider than a typical tunneling width of 1 – 2 nm. Charge tunneling to the  $\text{TiO}_2$  VB was shown for the case of degenerately n-type doped blue  $\text{TiO}_2$  nanotubes,<sup>6</sup> where their strong band bending at the liquid interface reduced the tunneling width to less than 1 – 2 nm. To summarize, “leaky” amorphous  $\text{TiO}_2$  without Mn alloying cannot make anodic charge extraction from surface intermediates such as the  $\text{Ti}^*\text{OH}$  states in the dark.

#### S4. Supplementary Figures and Tables

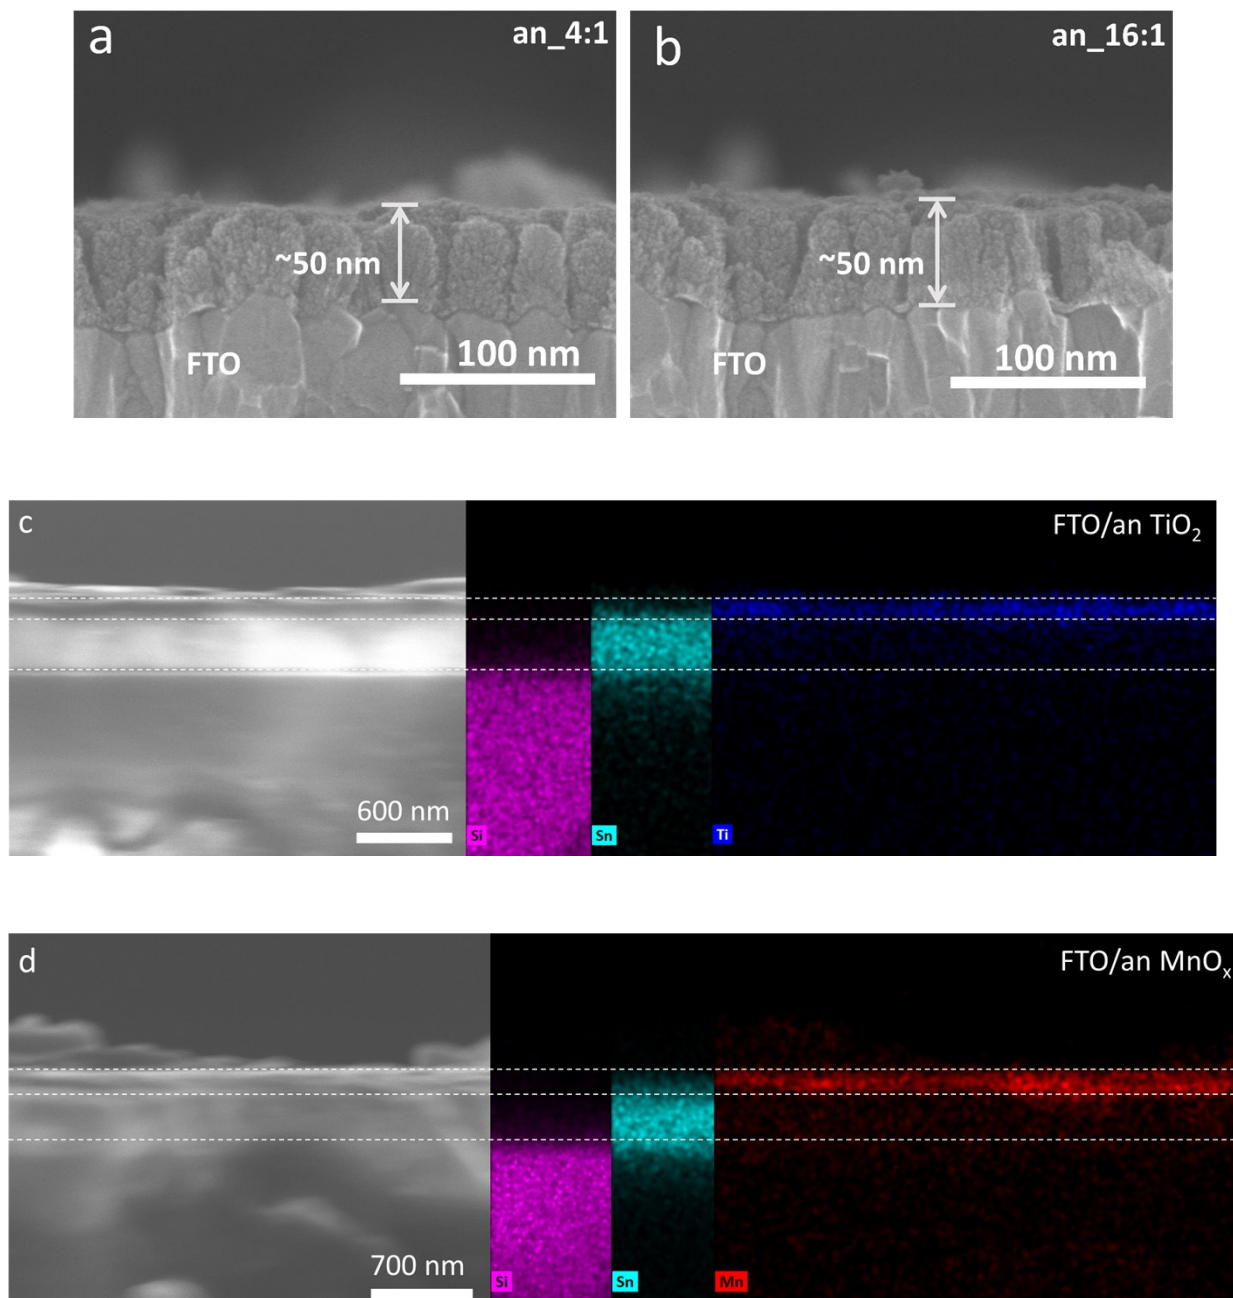

**Figure S1.** Cross-section SEM images of a) 4:1 (Ti,Mn)O<sub>x</sub>, b) 16:1 (Ti,Mn)O<sub>x</sub>, c) TiO<sub>x</sub>, and d) MnO<sub>x</sub> thin-film coatings on FTO substrates, after annealing in air at 500 °C for 2 hours. Dashed white lines for visualization.

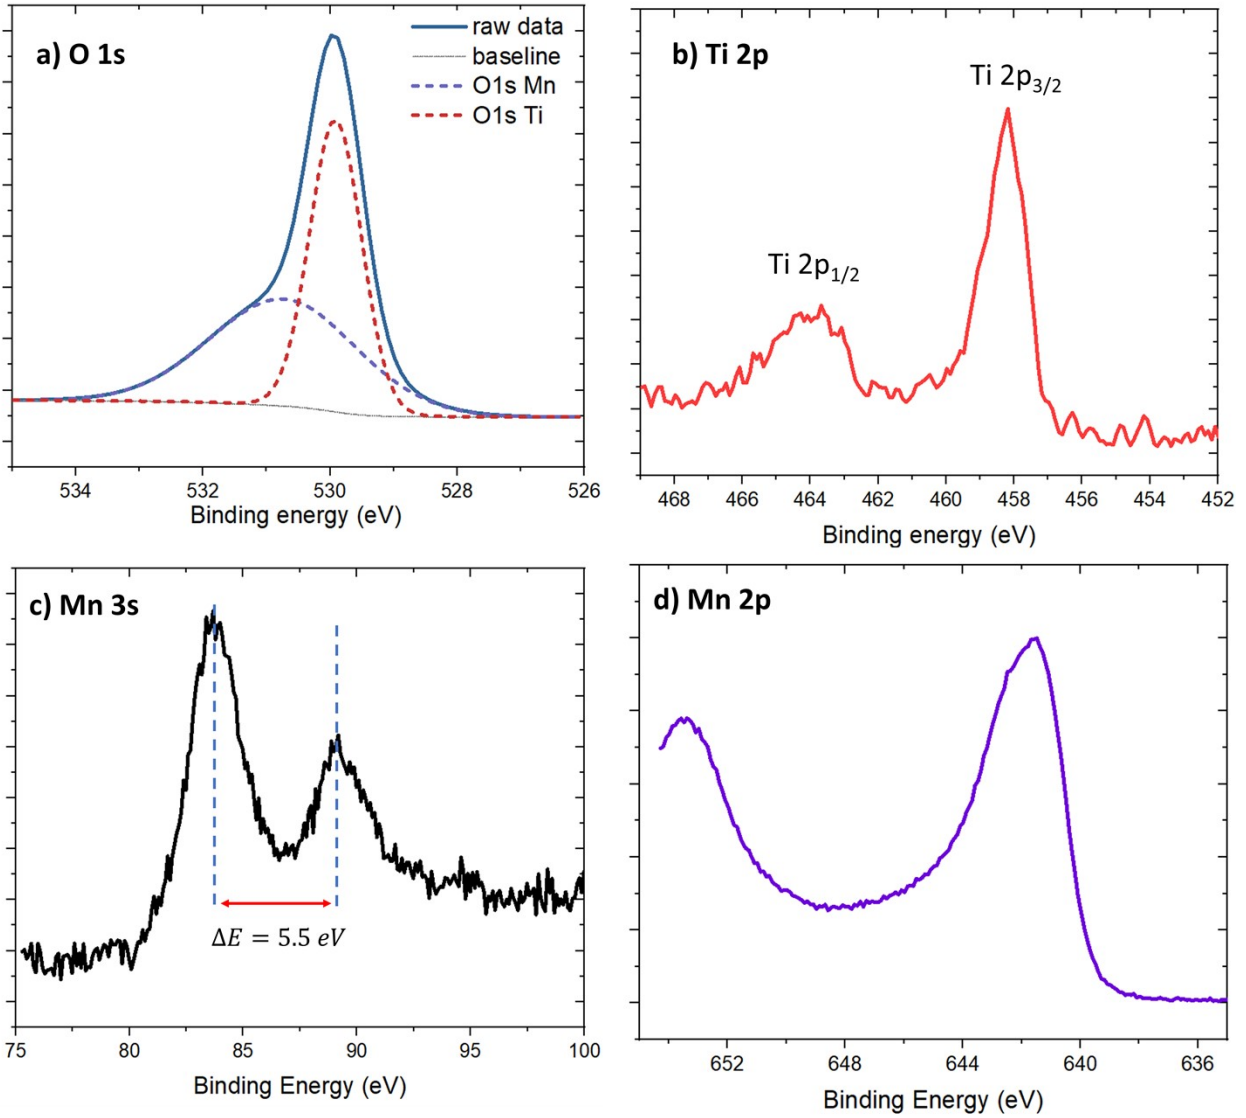

**Figure S2.** a) O 1s, b) Ti 2p, c) Mn 3s, and d) Mn 2p core-level XPS spectra for the 4:1 (Ti,Mn)O<sub>x</sub> films, which were grown on FTO substrates and then annealed in air at 500 °C for two hours.

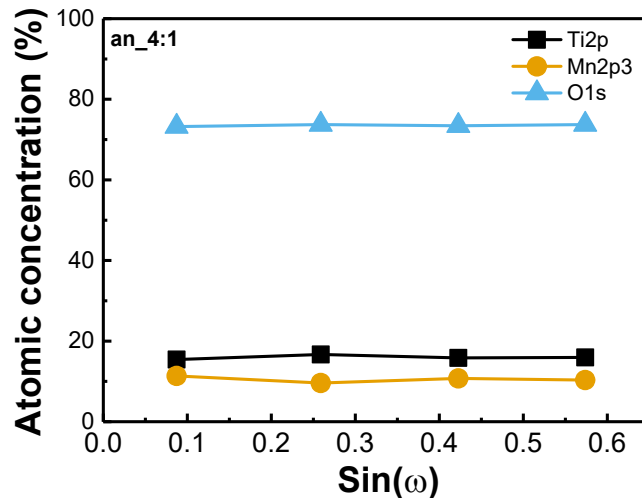

**Figure S3.** Correlation of the Ti, Mn and O atomic molar concentrations calculated from AR-XPS peak intensities with  $\sin(\omega)$ , for the annealed 4:1 (Ti,Mn) $O_x$  films, where  $\omega$  is the electron “take-off angle”. As  $\omega$  decreased, AR-XPS measurements became more surface sensitive. This technique enables non-destructive depth profiling of Mn compositions. According to the NIST standard reference database, the inelastic mean free path of the electron from Ti 2p and Mn 2p3 is found to be 22.8 Å and 26.62 Å, respectively. The sampling depth for the (Ti,Mn) $O_x$  surface was in the range of 6.5 – 39.1 Å for Ti, 5.6 – 33.7 Å for Mn, and 6.2 – 36.9 Å for O, as derived from the calculated electron inelastic mean free path. The Mn surface composition, i.e.,  $Mn\%/(Mn\%+Ti\%)$ , was  $36.09 \pm 2.1\%$ .

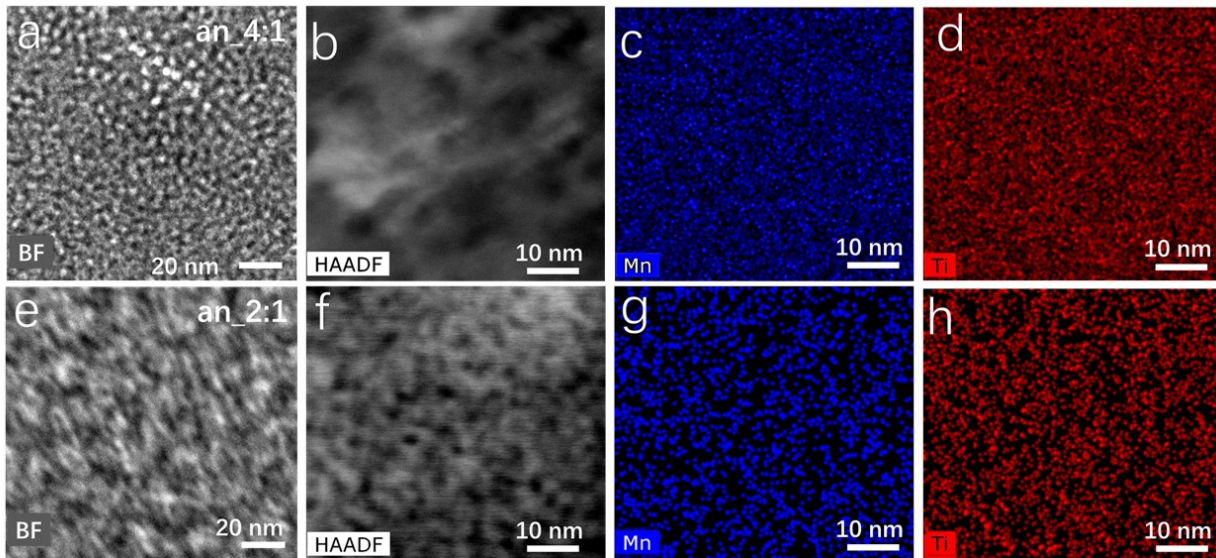

**Figure S4.** TEM characterizations of a-d) 4:1 and e-h) 2:1 annealed  $(\text{Ti,Mn})\text{O}_x$ . a) and e) Bright-field TEM images, b) and f) high-angle annual dark-field STEM images, c) and g) Mn energy-dispersive x-ray (EDX) maps, and d) and h) Ti EDX maps.

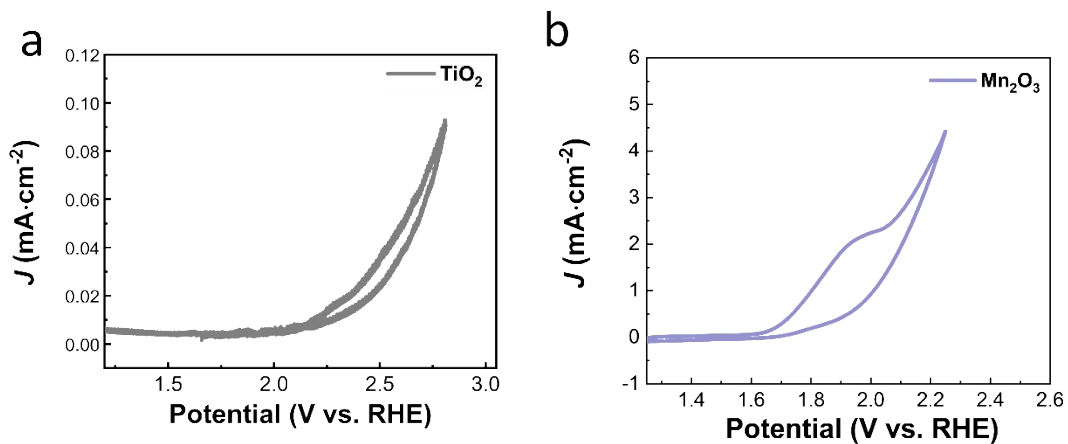

**Figure S5.**  $J$ - $E$  behavior of (a) annealed ALD  $\text{TiO}_x$  and (b) annealed ALD  $\text{MnO}_x$  films as a blank control in 0.5 M pH = 7 phosphate buffer at a scan rate of  $20 \text{ mV} \cdot \text{s}^{-1}$ .

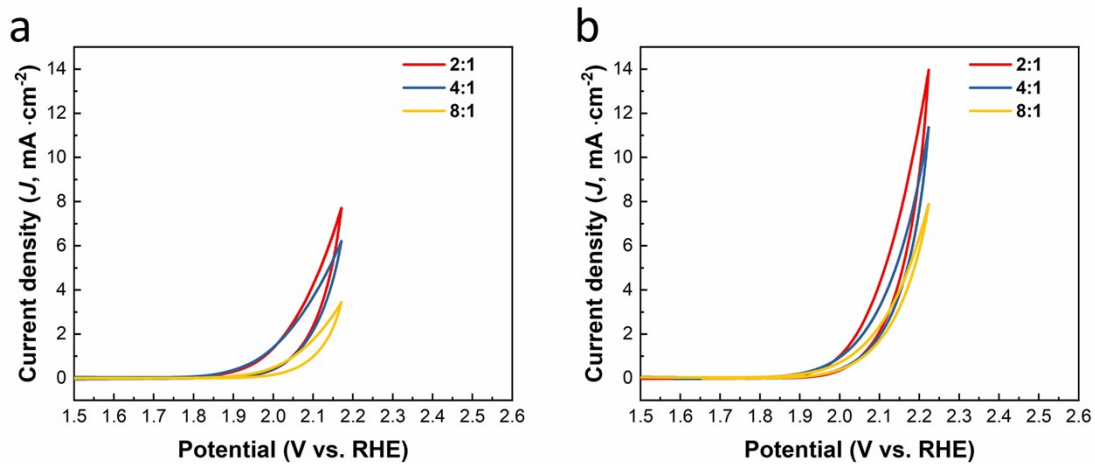

**Figure S6.** *J-E* curves of 500 °C air-annealed 2:1, 4:1 and 8:1 (Ti,Mn) $O_x$  thin films measured in 0.5 M a) pH = 3, and b) pH = 9 phosphate-buffered (PB) electrolytes. The scan rate was 20 mV · s<sup>-1</sup>.

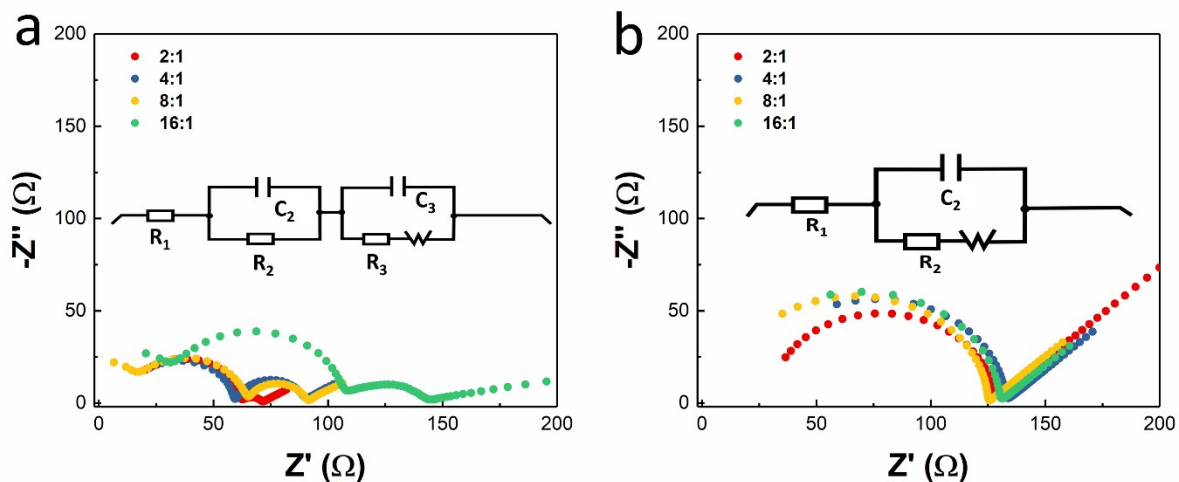

**Figure S7.** Electrochemical impedance profiles and resistivity analysis of annealed (Ti,Mn) $O_x$  films in contact with a) a  $Fe(CN)_6^{3-/4-}$  electrolyte and b) a PB (pH = 7) electrolyte, along with the equivalent circuit models illustrated in the figure inset. Data were obtained in the frequency range from  $6.0 \times 10^6$  Hz to  $1.6 \times 10^{-1}$  Hz. An equivalent circuitry of a series resistor in sequential connection with two pairs of parallel resistors and capacitors (constant phase elements used to justify the non-ideality of capacitance and to fit the impedance data for the  $Fe(CN)_6^{3-/4-}$  electrolyte) was employed. The circuitry elements include the solution resistance ( $R_1$ ); the (Ti,Mn) $O_x$  through-layer resistance ( $R_2$ ) and its parallel capacitance ( $C_2$ ); and the charge-transfer resistance ( $R_3$ ) from (Ti,Mn) $O_x$  to the electrolyte, which is in parallel with the double layer capacitance ( $C_3$ ); and the Warburg element (W) for justifying the diffusional impedance. In the PB electrolyte, only a solution resistor  $R_1$  with through-layer resistance  $R_2$  and its parallel capacitance  $C_2$ . The areas of all the electrodes were  $0.049 \text{ cm}^2$ .



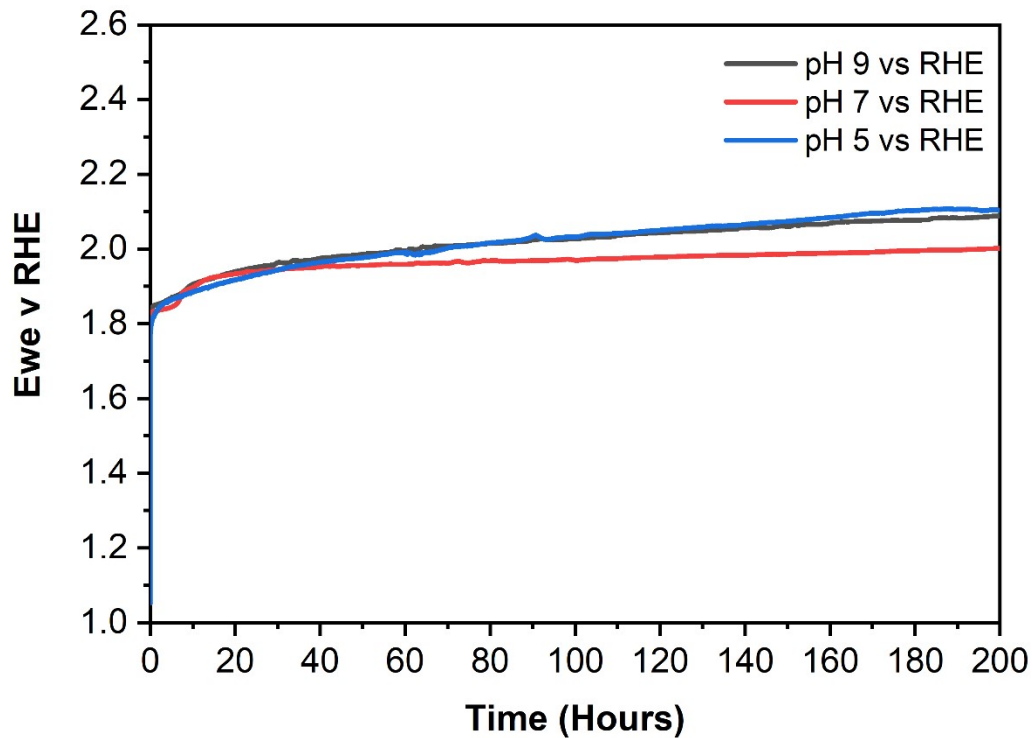

**Figure S8** Chronopotentiometry(CP) measurement of the annealed 4:1 (Ti,Mn) $O_x$  electrodes for evaluating long-term stability in 0.5M PBS solution at pH 5, 7, and 9. The current was fixed at  $0.2 \text{ mA}\cdot\text{cm}^{-2}$ , the potentials were measured with respect to the SCE reference electrode. Ti foil was used as the counter electrode. Potentials vs SCE were converted to vs RHE by adding 0.492 V for pH 5.0, 0.667 V for pH 7.2, and 0.801 V for pH 9.5.

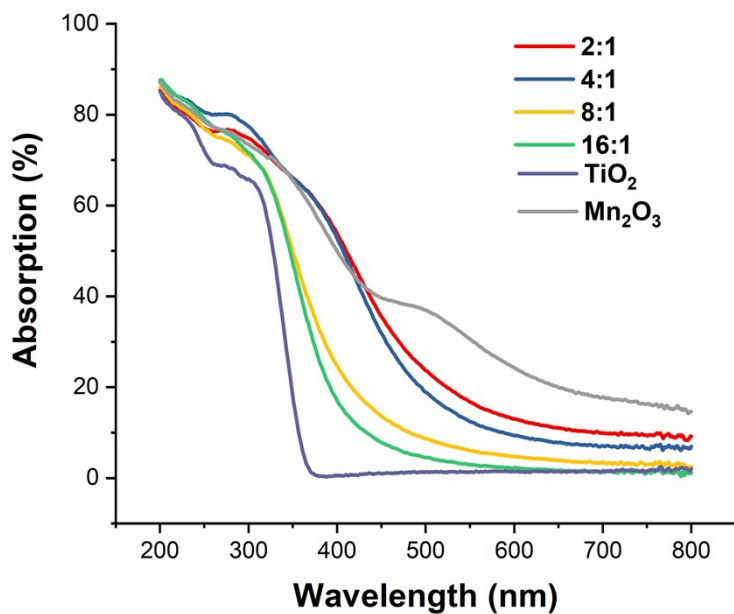

**Figure S9.** UV-Vis spectra of 2:1, 4:1, 8:1, 16:1 (Ti,Mn)O<sub>x</sub>, and “leaky” amorphous TiO<sub>2</sub> and Mn<sub>2</sub>O<sub>3</sub> thin films.

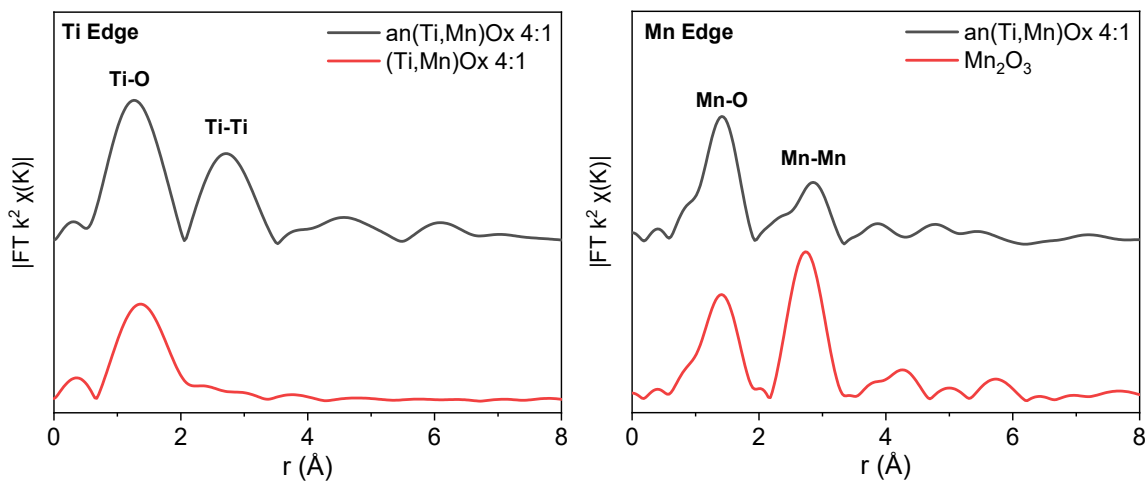

**Figure S10.** k<sup>2</sup>-weighted Fourier transformed EXAFS spectra of Ti and Mn edge of annealed 4:1 (Ti,Mn)O<sub>x</sub>

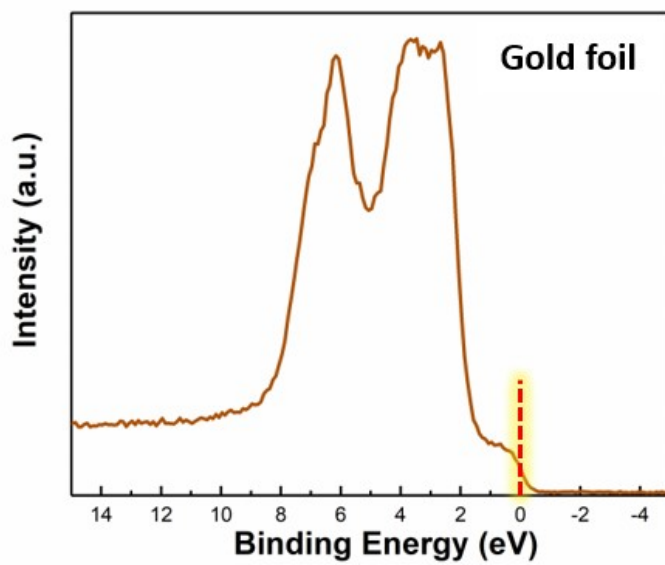

**Figure S11.** Valence XPS spectrum of a gold foil as a reference for the Fermi level.

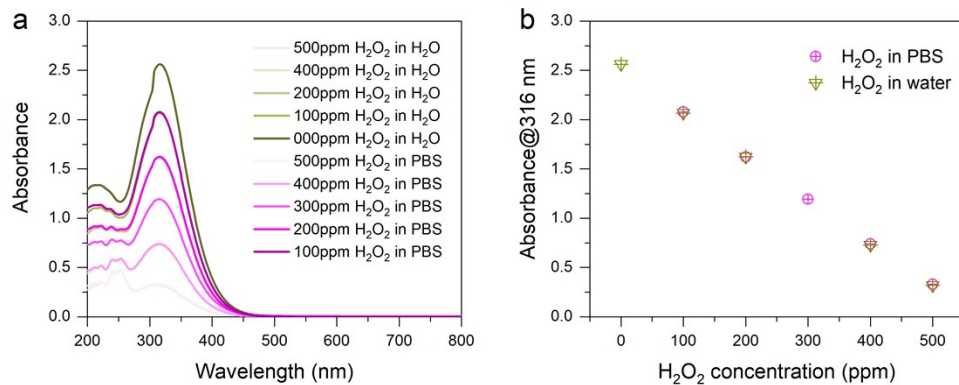

**Figure S12** (a) UV-vis absorption spectra of  $Ce^{4+}$  titration by known  $H_2O_2$  concentrations, and (b) linear fitting of absorbance at the 316 nm wavelength vs the known  $H_2O_2$  concentrations.

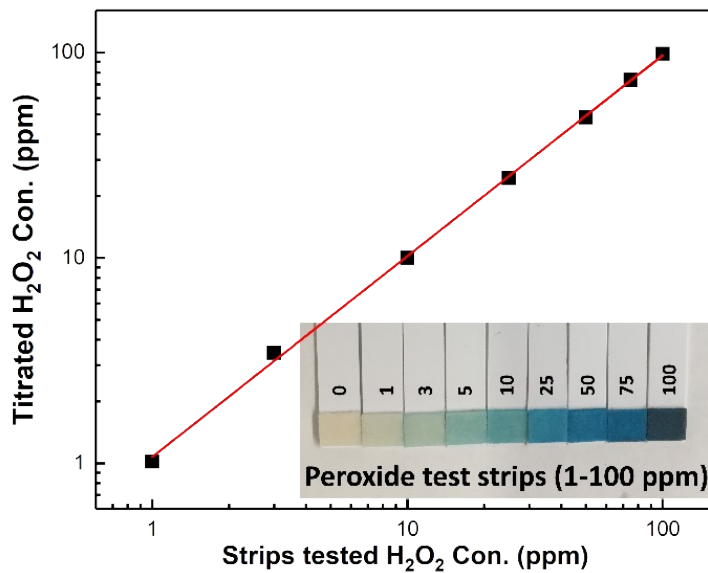

**Figure S13.** H<sub>2</sub>O<sub>2</sub> quantification and calibration. Nine H<sub>2</sub>O<sub>2</sub> aqueous standards, including the concentrations of 0, 1, 3, 5, 10, 25, 50, 75, and 100 ppm, were quantified both by using the standard strips (inset) and by using the permanganate titration.

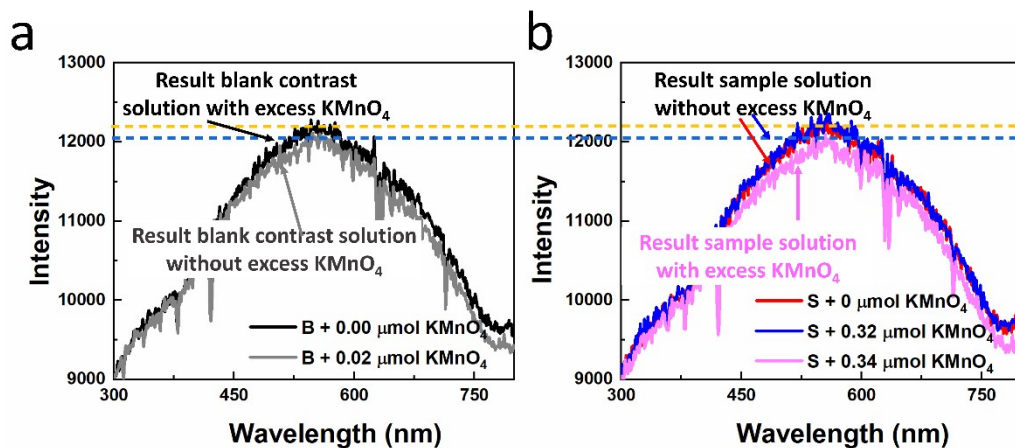

**Figure S14.** UV-Vis absorption spectra at 525 nm for (a) a pH=7 PB electrolyte, and (b) an H<sub>2</sub>O<sub>2</sub>-containing electrolysis sample solution. B refers to the blank control, a mixture of the 1 mL pH = 7 phosphate buffer and 1 mL H<sub>2</sub>SO<sub>4</sub> (aq, 1.0 M) solution. S refers to a mixture of the 1 mL aliquot, which was extracted from the H<sub>2</sub>O<sub>2</sub>-containing electrolysis working solution, and 1 mL H<sub>2</sub>SO<sub>4</sub> (aq, 1.0 M). The spectral sensitivity allows a detection accuracy down to 0.02 μmol, which gives a measurement error of 0.01 mmol L<sup>-1</sup>.

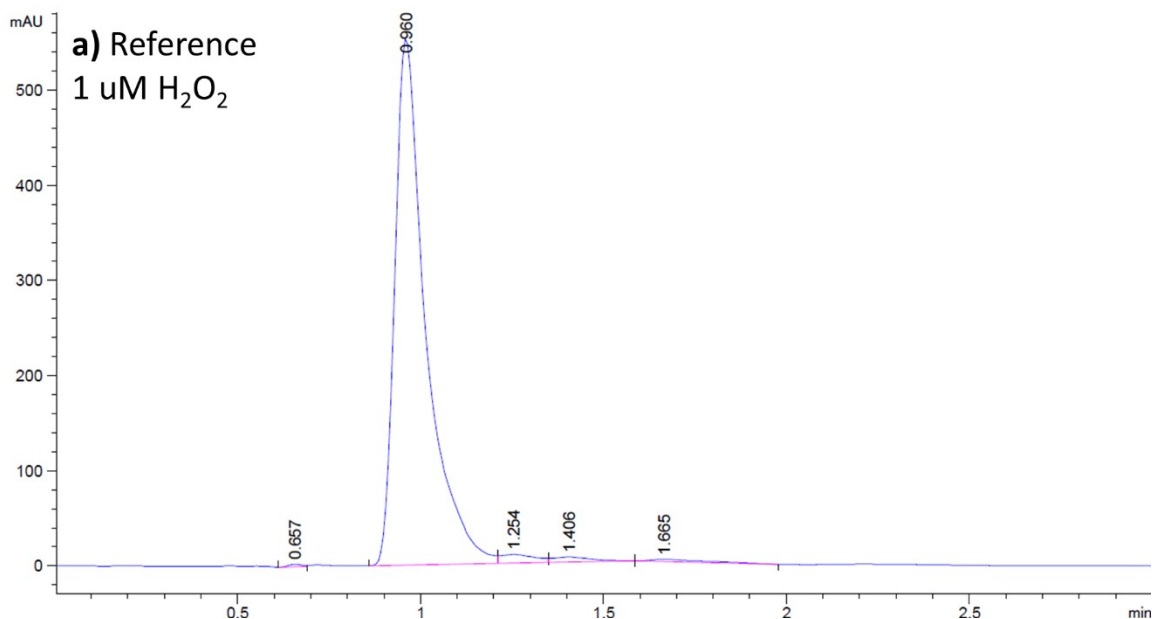

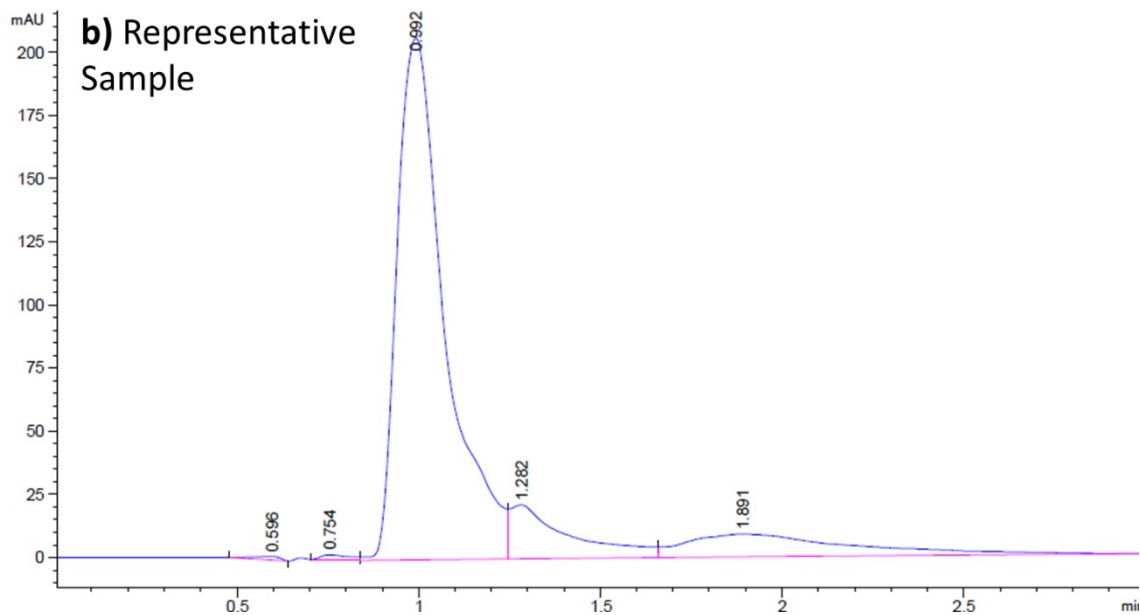

**Figure S15.** a) HPLC data of 1  $\mu\text{M}$   $\text{H}_2\text{O}_2$  reference and b) HPLC data of a representative sample taken from a chronoamperometry experiment and diluted. HPLC is employed to provide the supporting evidence that the oxidant formed is molecular  $\text{H}_2\text{O}_2$ .  $\text{H}_2\text{O}_2$  peak begins at  $x = .96$  min. HPLC samples of 0 – 4  $\mu\text{M}$   $\text{H}_2\text{O}_2$  are used to create a calibration curve. Using the peak area, the representative sample was determined to be .6  $\mu\text{M}$ . HPLC was used strictly to verify the identity of the oxidation. Permanganate titration verified with Cerium Titration was used to quantify  $\text{H}_2\text{O}_2$  produced. Complete data of calibration references and the three representative samples are listed in **Table S6**.

**Table S1.** Binding energies (BEs) and full-width at half-maxima (FWHM) of peaks in the deconvolution of (Ti,Mn)O<sub>x</sub>

| 4:1 Annealed (Ti,Mn)O <sub>x</sub> |       |      |                     |                     |                                                                           |                                                                           |                                                                |                                                                |                 |                |        |                 |
|------------------------------------|-------|------|---------------------|---------------------|---------------------------------------------------------------------------|---------------------------------------------------------------------------|----------------------------------------------------------------|----------------------------------------------------------------|-----------------|----------------|--------|-----------------|
|                                    | Ti:Mn |      | Mn3d <sub>5/2</sub> | Mn3d <sub>3/2</sub> | O <sub>2p</sub> - $\pi$<br>(t <sub>2g</sub> )<br>From<br>MnO <sub>x</sub> | O <sub>2p</sub> - $\pi$<br>(t <sub>2g</sub> )<br>From<br>TiO <sub>2</sub> | O <sub>2p</sub> - $\sigma$<br>(eg)<br>From<br>MnO <sub>x</sub> | O <sub>2p</sub> - $\sigma$<br>(eg)<br>From<br>TiO <sub>2</sub> | $E_F - E_{VBM}$ | $E_F - E_{IB}$ | Mn at% | Mn at% Reported |
| Type 1                             | 4-1   | BE   | 1.14                | 3.03                | 4.30                                                                      | 4.85                                                                      | 6.80                                                           | 7.10                                                           | 2.31            | 1.14           | 36.09  | 37              |
|                                    |       | FHWM | 1.60                | 1.85                | 2.14                                                                      | 2.15                                                                      | 2.20                                                           | 2.28                                                           |                 |                |        |                 |
|                                    |       | A%   | 7.67                | 27.39               | 20.10                                                                     | 18.01                                                                     | 13.51                                                          | 11.32                                                          |                 |                |        |                 |

Energy positions of valence band maxima and intermediate band maxima are with respect to the Fermi level positions, and Mn atomic compositions (%) of the (Ti,Mn)O<sub>x</sub> thin films that were annealed in air at 500 °C for two hours.  $E_F - E_{VBM}$  is the difference in energy levels between the VBM and the Fermi level. The VBM is assigned by O2p- $\pi$  state.  $E_F - E_{IB}$  is the difference in energy between the IB (intermediate-band position) and the Fermi level. These energy-level differences BE and FWHM are presented in the unit of eV. With XPS peak broadening effects, FWHM should make an overestimation of Mn-IB band width, or should give an upper bound for the energy range of Mn-impurity IB states. A% indicates the percentage area of the spectral peak's ratio that is normalized to the O2p core-level areal intensity, assigned as the A% for Peaks III and IV add up to 100%. The IB centre is determined by the band position of Mn3d<sup>5/2</sup> states. All fitting data are listed in **Table S2** and the fitting error is  $\pm 0.10$  eV.



**Table S2.** Binding Energy (BE), the full wide half band-width (FWHM), and area ratios of O1s, Ti2p, Mn2p3 and Mn3s core level peaks fittings of annealed 4:1 (Ti,Mn)O<sub>x</sub> films. BE difference between two peaks of Ti2p ( $\Delta E_{\text{Ti2p}}^{1/2-3/2}$ ) and Mn3s ( $\Delta E_{\text{Mn3s}}$ ) were also listed. Fitting errors are  $\pm 0.02$  eV.

|     |           | O1s <sup>I</sup><br>(O-OH) | O1s <sup>II</sup><br>(O-metal) | Ti2p <sup>1/2</sup> | Ti2p <sup>3/2</sup> | $\Delta E_{\text{Ti2p}}^{1/2-3/2}$<br>( $\pm 0.02$ eV) | Mn2p3  | $\Delta E_{\text{Mn3s}}$<br>( $\pm 0.01$ eV) |
|-----|-----------|----------------------------|--------------------------------|---------------------|---------------------|--------------------------------------------------------|--------|----------------------------------------------|
| 4:1 | BE (eV)   | 531.02                     | 529.8                          | 463.77              | 458.01              | 5.76                                                   | 641.23 | 5.52                                         |
|     | FWHM (eV) | 2.29                       | 1.05                           | 2.39                | 1.47                |                                                        |        |                                              |
|     | A%        | 36.59                      | 63.41                          | 34.31               | 65.69               |                                                        |        |                                              |

**Table S3.** Fitting summary for the electrochemical impedance spectroscopy (EIS) data of annealed 2:1, 4:1 8:1 and 16:1 (Ti,Mn)O<sub>x</sub> (in air at 500 °C for 2 hours), measured in the Fe(CN)<sub>6</sub><sup>3-/4-</sup> and PB (phosphate buffer, total phosphate concentration of 0.5 M) electrolytes, respectively.

| Electrolytes                                                    | Fe (CN) <sub>6</sub> <sup>3-/4-</sup> |       |       |       | PB (pH = 7, 0.5 M) |       |       |       |
|-----------------------------------------------------------------|---------------------------------------|-------|-------|-------|--------------------|-------|-------|-------|
|                                                                 | 2-1                                   | 4-1   | 8-1   | 16-1  | 2-1                | 4-1   | 8-1   | 16-1  |
| Annealed (Ti,Mn)O <sub>x</sub>                                  |                                       |       |       |       |                    |       |       |       |
| Solution resistance, R <sub>1</sub> (Ω)                         | 13.8                                  | 12.44 | 14.74 | 31.51 | 29.72              | 19.69 | 8.49  | 12.94 |
| Through-layer resistance, R <sub>2</sub> (Ω)                    | 48.6                                  | 47.25 | 50.02 | 78.02 | 96.84              | 112.3 | 115.8 | 120.3 |
| Capacitance, C <sub>2</sub> , (nF·cm <sup>-2</sup> )            | 106.3                                 | 134.3 | 120.4 | 93.9  | 37.45              | 12.18 | 7.35  | 0.96  |
| Charge-transfer resistance, R <sub>3</sub> (Ω)                  | 8.57                                  | 8.24  | 25.2  | 30.57 | NA                 | NA    | NA    | NA    |
| Double-layer capacitance, C <sub>3</sub> (mF·cm <sup>-2</sup> ) | 0.47                                  | 0.6   | 0.2   | 0.14  | NA                 | NA    | NA    | NA    |
| Diffusion coefficient (Ohm·s <sup>-1/2</sup> )                  | 7.156                                 | 11.08 | 9.5   | 20.07 | 937.1              | 622.1 | 346.1 | 565   |

**Table S4.** Summary of the current density ( $J$ ,  $\text{mA}\cdot\text{cm}^{-2}$ ) and charge quantity ( $Q-Q_0$ , C) vs. time (h), the titration outcome and the averaged Faradaic efficiency (FE).

| Time (h) | Current density ( $J$ , $\text{mA}\cdot\text{cm}^{-2}$ ) | Charge (C) | Titration $\text{KMnO}_4$ (mL) | $n_{\text{H}_2\text{O}_2}$ ( $\mu\text{mol}$ ) | $c_{\text{H}_2\text{O}_2}$ ( $\text{mmol}\cdot\text{L}^{-1}$ ) | $n^{\theta}(\text{H}_2\text{O}_2)$ ( $\mu\text{mol}$ ) | FE (%) |
|----------|----------------------------------------------------------|------------|--------------------------------|------------------------------------------------|----------------------------------------------------------------|--------------------------------------------------------|--------|
| 1        | 0.24                                                     | 1.90       | 0.048                          | 9.6                                            | 0.49                                                           | 9.85                                                   | 97.50  |
| 2        | 0.19                                                     | 3.63       | 0.089                          | 17.8                                           | 0.94                                                           | 18.79                                                  | 91.68  |
| 3        | 0.20                                                     | 4.93       | 0.120                          | 24.0                                           | 1.28                                                           | 25.55                                                  | 91.75  |
| 4        | 0.20                                                     | 6.30       | 0.149                          | 29.8                                           | 1.63                                                           | 32.65                                                  | 81.70  |
| 6        | 0.17                                                     | 8.94       | 0.204                          | 40.8                                           | 2.32                                                           | 46.33                                                  | 80.40  |
| 8        | 0.16                                                     | 11.47      | 0.255                          | 51.0                                           | 2.97                                                           | 59.44                                                  | 77.80  |

4:1(Ti,Mn) $\text{O}_x$  film electrode ( $1.2 \text{ cm}^2$  electrode area) was used. All electrolysis measurements were conducted in 20 mL, 0.5 M, and  $\text{pH} = 7$  PB electrolytes, with a Ti foil as the counter electrode. The FE (%) is reported for an averaged value at the time of cumulative hours. For example, the FE after eight-hour electrolysis was calculated using the total accumulated molar quantity of  $\text{H}_2\text{O}_2$  (e.g., 59.44  $\mu\text{mol}$ ) divided by the total charge passed (e.g., 11.47 C) by following Equations S1– S4.

**Table S5.** Comparison to published work on selective water oxidation for H<sub>2</sub>O<sub>2</sub> production.

| H <sub>2</sub> O <sub>2</sub> Generation                                    | Sayama and co-workers          |                                                 |                                                                                     | Zheng and co-workers           |                                 | Wang and co-workers        | This work             |
|-----------------------------------------------------------------------------|--------------------------------|-------------------------------------------------|-------------------------------------------------------------------------------------|--------------------------------|---------------------------------|----------------------------|-----------------------|
| Catalyst (anode) <sup>Ref</sup>                                             | BiVO <sub>4</sub> <sup>7</sup> | WO <sub>3</sub> /BiVO <sub>4</sub> <sup>8</sup> | WO <sub>3</sub> /BiVO <sub>4</sub> /<br>Al <sub>2</sub> O <sub>3</sub> <sup>9</sup> | BiVO <sub>4</sub> <sup>2</sup> | BiVO <sub>4</sub> <sup>10</sup> | Carbon fiber <sup>11</sup> | (Ti,Mn)O <sub>x</sub> |
| Overpotential (mV, vs. 1.76 V <sub>RHE</sub> ) at J=0.2 mA cm <sup>-2</sup> | 500 mV                         | /                                               | /                                                                                   | 500 mV                         | /                               | /                          | 50 mV                 |
| Highest FE (%)                                                              | 35% (under illumination)       | 54% (under illumination)                        | 80% (under illumination)                                                            | 70% (in the dark)              | 95% (under illumination)        | 66% (in the dark)          | >95% (in the dark)    |
| Accumulated <i>n</i> (μmol) per Q (C)                                       | 0.76 μmol/C (220 C)            | 0.45 μmol/C (50 C)                              | 0.7 μmol/C (100 C)                                                                  | 2.56 μmol/C (17C)              | 2.56 μmol/C (3C)                | 5.19 μmol/C (805 C)        | 4.82 μmol/C (11.4 C)  |
| Average FE (%)<br>(5.18 μmol C <sup>-1</sup> for 100%)                      | 14.8%                          | 28%                                             | 13.5%                                                                               | 70%                            | 53%                             | 66%                        | 93.5%                 |
| <i>c</i> (H <sub>2</sub> O <sub>2</sub> ) (mmol L <sup>-1</sup> )           | 5 mM (35 mL)                   | 1.3 mM (35 mL)                                  | 2 mM (35 mL)                                                                        | 0.5 mM (15 mL)                 | 5.12 mM (15 mL)                 | 167 mM (25 mL)             | 2.9 mM (20 mL)        |

**Table S6.** Data from HPLC (see **Figure S15** and Ret is short for Retention)

| Reference 1 ( 0 μM) |                |               |                 |                 |               |
|---------------------|----------------|---------------|-----------------|-----------------|---------------|
| Peak #              | Ret Time (min) | Width         | Area            | Height          | Area %        |
| 1                   | 0.657          | 0.039         | 5.591           | 2.345           | 2.964         |
| <b>2</b>            | <b>0.961</b>   | <b>0.091</b>  | <b>142.237</b>  | <b>22.317</b>   | <b>71.334</b> |
| 3                   | 1.67           | 0.183         | 51.25           | 3.713           | 25.703        |
| Reference 2 (1 μM)  |                |               |                 |                 |               |
| Peak #              | Ret Time (min) | Width         | Area            | Height          | Area %        |
| 1                   | 0.657          | 0.404         | 7.37            | 2.828           | 0.218         |
| <b>2</b>            | <b>0.96</b>    | <b>0.086</b>  | <b>3252.686</b> | <b>553.662</b>  | <b>96.057</b> |
| 3                   | 1.254          | 0.094         | 59.431          | 9.049           | 1.755         |
| 4                   | 1.406          | 0.107         | 39.708          | 5.411           | 1.173         |
| 5                   | 1.665          | 0.144         | 26.996          | 2.57            | 0.079         |
| Reference 3 (2 μM)  |                |               |                 |                 |               |
| Peak #              | Ret Time (min) | Width         | Area            | Height          | Area %        |
| 1                   | 0.653          | 0.0456        | 8.486           | 2.949           | 0.135         |
| <b>2</b>            | <b>0.961</b>   | <b>0.0855</b> | <b>6028.245</b> | <b>1011.931</b> | <b>95.604</b> |
| 3                   | 1.253          | 0.0917        | 110.421         | 17.007          | 1.751         |
| 4                   | 1.397          | 0.1068        | 82.406          | 11.071          | 1.307         |

|                    |                |              |                 |                 |               |
|--------------------|----------------|--------------|-----------------|-----------------|---------------|
| 5                  | 1.663          | 0.0815       | 11.089          | 2.036           | 0.176         |
| 6                  | 1.786          | 0.126        | 28.833          | 3.365           | 0.457         |
| 7                  | 2.188          | 0.3148       | 35.976          | 1.819           | 0.571         |
| Reference 3 (3 µM) |                |              |                 |                 |               |
| Peak #             | Ret Time (min) | Width        | Area            | Height          | Area %        |
| 1                  | 0.534          | 0.133        | 30.237          | 3.076           | 0.323         |
| 2                  | 0.657          | 0.039        | 5.832           | 2.361           | 0.062         |
| <b>3</b>           | <b>0.96</b>    | <b>0.085</b> | <b>8919.528</b> | <b>1512.307</b> | <b>95.286</b> |
| 4                  | 1.252          | 0.091        | 163.877         | 25.45           | 1.751         |
| 5                  | 1.39           | 0.104        | 120.575         | 16.719          | 1.288         |
| 6                  | 1.657          | 0.073        | 7.161           | 1.476           | 0.077         |
| 7                  | 1.789          | 0.123        | 61.447          | 7.209           | 0.656         |
| 8                  | 2.176          | 0.331        | 51.13           | 2.438           | 0.557         |
| Reference 4 (4 µM) |                |              |                 |                 |               |
| Peak #             | Ret Time (min) | Width        | Area            | Height          | Area %        |
| 1                  | 0.532          | 0.1563       | 46.713          | 4.118           | 0.38          |
| 2                  | 0.657          | 0.042        | 5.648           | 2.201           | 0.046         |
| <b>3</b>           | <b>0.959</b>   | <b>0.087</b> | <b>11681.1</b>  | <b>1963.293</b> | <b>95.058</b> |
| 4                  | 1.252          | 0.093        | 215.037         | 33.601          | 1.749         |
| 5                  | 1.388          | 0.113        | 186.271         | 23.404          | 1.515         |
| 6                  | 1.786          | 0.119        | 91.334          | 11.406          | 0.0743        |
| 7                  | 2.171          | 0.312        | 62.27           | 2.599           | 0.507         |
| Sample 1           |                |              |                 |                 |               |
| Peak #             | Ret Time (min) | Width        | Area            | Height          | Area %        |
| 1                  | 0.596          | 0.067        | 6.496           | 1.391           | 0.026         |
| 2                  | 0.754          | 0.081        | 12.624          | 2.262           | 0.515         |
| <b>3</b>           | <b>0.992</b>   | <b>0.139</b> | <b>1894.459</b> | <b>206.625</b>  | <b>77.304</b> |
| 4                  | 1.282          | 0.149        | 244.281         | 21.339          | 9.968         |
| 5                  | 1.891          | 0.435        | 292.799         | 9.017           | 11.948        |
| Sample 2           |                |              |                 |                 |               |
| Peak #             | Ret Time (min) | Width        | Area            | Height          | Area %        |
| 1                  | 0.757          | 0.088        | 15.182          | 2.467           | 0.594         |
| <b>2</b>           | <b>0.992</b>   | <b>0.144</b> | <b>1987.855</b> | <b>211.339</b>  | <b>77.766</b> |
| 3                  | 1.277          | 0.152        | 269.227         | 22.751          | 10.532        |
| 4                  | 1.866          | 0.41         | 283.938         | 8.621           | 11.108        |
| Sample 3           |                |              |                 |                 |               |
| Peak #             | Ret Time (min) | Width        | Area            | Height          | Area %        |
| 1                  | 0.59           | 0.085        | 10.736          | 1.756           | 0.434         |
| 2                  | 0.754          | 0.088        | 14.861          | 2.417           | 0.601         |
| <b>3</b>           | <b>0.991</b>   | <b>0.148</b> | <b>1911.921</b> | <b>199.918</b>  | <b>77.234</b> |
| 4                  | 1.276          | 0.153        | 265.049         | 22.231          | 10.707        |
| 5                  | 1.861          | 0.419        | 272.909         | 8.472           | 11.024        |

## S5. Supplementary References

1. Siddiqi, G.; Luo, Z.; Xie, Y.; Pan, Z.; Zhu, Q.; Röhr, J. A.; Cha, J. J.; Hu, S., Stable water oxidation in acid using manganese-modified TiO<sub>2</sub> protective coatings. *ACS Applied Materials & Intererfaces* **2018**, *10* (22), 18805-18815.
2. Shi, X.; Siahrostami, S.; Li, G.-L.; Zhang, Y.; Chakthranont, P.; Studt, F.; Jaramillo, T. F.; Zheng, X.; Nørskov, J. K., Understanding activity trends in electrochemical water oxidation to form hydrogen peroxide. *Nature Communications* **2017**, *8* (1), 701.
3. Nelson, A.; Reynolds, J. G.; Roos, J. W., Core-level satellites and outer core-level multiplet splitting in Mn model compounds. *Journal of Vacuum Science & Technology A: Vacuum, Surfaces, and Films* **2000**, *18* (4), 1072-1076.
4. Nunez, P.; Richter, M. H.; Piercy, B. D.; Roske, C. W.; Cabán-Acevedo, M.; Losego, M. D.; Konezny, S. J.; Fermin, D. J.; Hu, S.; Brunshwig, B. S.; Lewis, N. S., Characterization of electronic transport through amorphous TiO<sub>2</sub> produced by atomic-layer deposition. *The Journal of Physical Chemistry C* **2019** *123* (33), 20116-20129.
5. Lichterman, M. F.; Hu, S.; Richter, M. H.; Crumlin, E. J.; Axnanda, S.; Favaro, M.; Drisdell, W.; Hussain, Z.; Mayer, T.; Brunshwig, B. S.; Lewis, N. S.; Liu, Z.; Lewerenz, H.-J., Direct observation of the energetics at a semiconductor/liquid junction by operando X-ray photoelectron spectroscopy. *Energy & Environmental Science* **2015**, *8* (8), 2409-2416.
6. Yang, Y.; Hoffmann, M. R., Synthesis and stabilization of blue-black TiO<sub>2</sub> nanotube arrays for electrochemical oxidant generation and wastewater treatment. *Environmental Science & Technology* **2016**, *50* (21), 11888-11894.
7. Fuku, K.; Miyase, Y.; Miseki, Y.; Gunji, T.; Sayama, K., Enhanced oxidative hydrogen peroxide production on conducting glass anodes modified with metal oxides. *ChemistrySelect* **2016**, *1* (18), 5721-5726.
8. Fuku, K.; Miyase, Y.; Miseki, Y.; Gunji, T.; Sayama, K., WO<sub>3</sub>/BiVO<sub>4</sub> photoanode coated with mesoporous Al<sub>2</sub>O<sub>3</sub> layer for oxidative production of hydrogen peroxide from water with high selectivity. *RSC Advances* **2017**, *7* (75), 47619-47623.
9. Fuku, K.; Sayama, K., Efficient oxidative hydrogen peroxide production and accumulation in photoelectrochemical water splitting using a tungsten trioxide/bismuth vanadate photoanode. *Chemical Communications* **2016**, *52* (31), 5406-5409.
10. Shi, X.; Zhang, Y.; Siahrostami, S.; Zheng, X., Light-driven BiVO<sub>4</sub>-C fuel cell with simultaneous production of H<sub>2</sub>O<sub>2</sub>. *Advanced Energy Materials* **2018**, 1801158.
11. Xia, C.; Back, S.; Ringe, S.; Jiang, K.; Chen, F.; Sun, X.; Siahrostami, S.; Chan, K.; Wang, H., Confined local oxygen gas promotes electrochemical water oxidation to hydrogen peroxide. *Nature Catalysis* **2020**, *3* (2), 125-134.
